# Supplementary material
Source: Frontiers journal article supplement (https://www.frontiersin.org/articles/516041)
Supplement: Table_1.pdf [file Table_1.pdf]

**Supplementary File 1.** Pearson's correlations among gross motor, fine motor and cognitive scores at 6 months.

|                 | 6-months    |          |            |                 |           |                 |
|-----------------|-------------|----------|------------|-----------------|-----------|-----------------|
|                 | Gross motor |          | Fine motor |                 | Cognitive |                 |
|                 | <i>r</i>    | <i>p</i> | <i>r</i>   | <i>p</i>        | <i>r</i>  | <i>p</i>        |
| <b>6-months</b> |             |          |            |                 |           |                 |
| Gross motor     | -           | -        | .661       | <b>&lt;.001</b> | .687      | <b>&lt;.001</b> |
| Fine motor      | -           | -        | -          | -               | .776      | <b>&lt;.001</b> |

*Note.* Raw scores of gross motor (locomotor subscale), fine motor (eye and hand coordination subscale) and cognitive skills (performance subscale) of the Griffiths Mental Development Scales were used. Significant results ( $p < .05$ ) are in bold.
