# Supplementary material
Source: Frontiers journal article supplement (https://www.frontiersin.org/articles/516041)
Supplement: Table_2.pdf [file Table_2.pdf]

**Supplementary File 2.** Pearson's correlations among gross motor, fine motor and cognitive scores at 12 months.

| 12 months        |             |          |            |             |           |             |
|------------------|-------------|----------|------------|-------------|-----------|-------------|
|                  | Gross motor |          | Fine motor |             | Cognitive |             |
|                  | <i>r</i>    | <i>p</i> | <i>r</i>   | <i>p</i>    | <i>r</i>  | <i>p</i>    |
| <b>12-months</b> |             |          |            |             |           |             |
| Gross motor      | -           | -        | .478       | <b>.002</b> | .486      | <b>.001</b> |
| Fine motor       | -           | -        | -          | -           | .507      | <b>.001</b> |

*Note.* Raw scores of locomotor (locomotor subscale), eye and hand coordination (eye and hand coordination subscale) and performance (performance subscale) of the Griffiths Mental Development Scales were used. Significant results ( $p < .05$ ) are in bold.
